# Supplementary material for: Tumor derived UBR5 promotes ovarian cancer growth and metastasis through inducing immunosuppressive macrophages
Source: PubMed Central journal article supplement (PMC7722725; doi:10.1038/s41467-020-20140-0), 2020-12-08
Supplement: 41467_2020_20140_MOESM1_ESM.pdf [file 41467_2020_20140_MOESM1_ESM.pdf]

# **Supplementary Information**

**Tumor derived UBR5 promotes ovarian cancer growth and  
metastasis through inducing immunosuppressive  
macrophages**

**This file includes:**

- Supplementary Figures 1-13
- Supplementary Tables 1-5

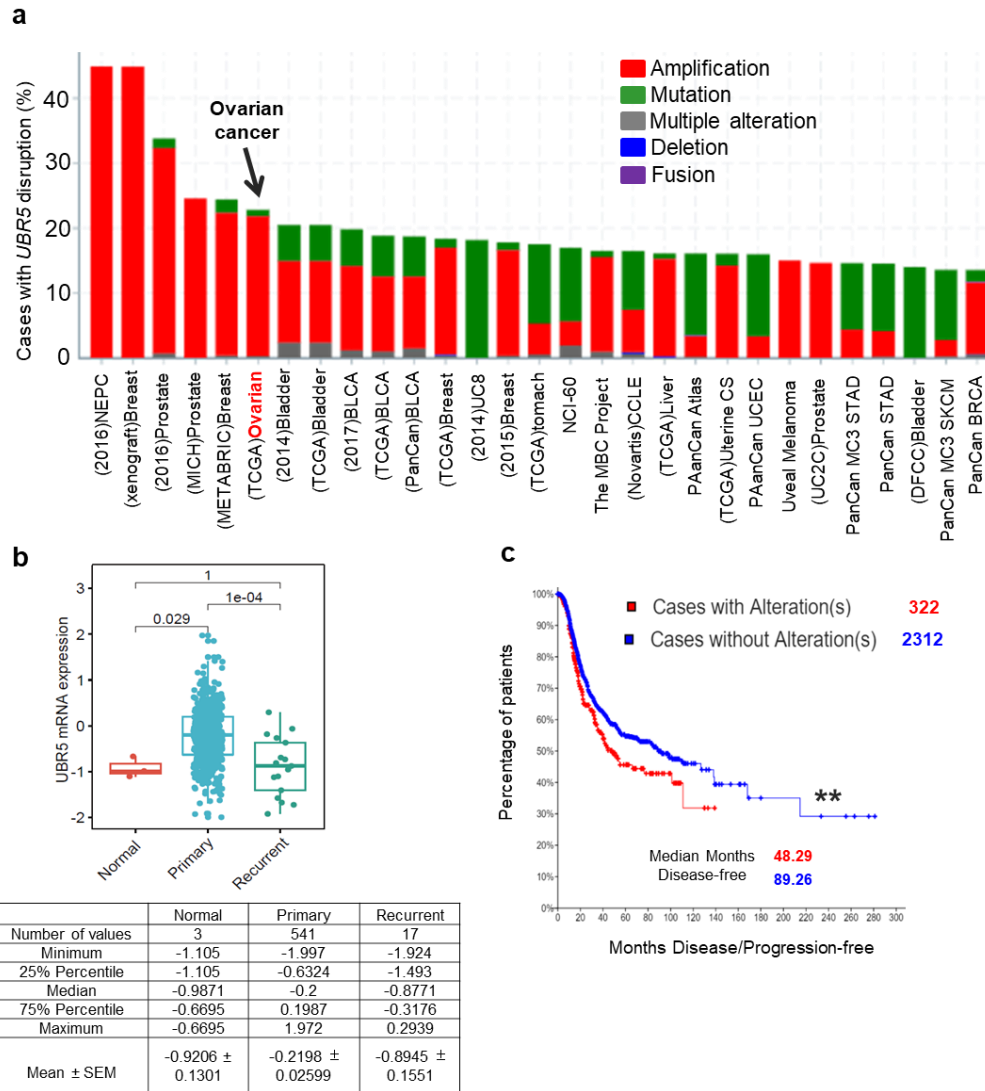

**Supplementary Fig.1: Clinical observations of UBR5's involvement in ovarian cancer. Figure supplementary to main Figure 1**

**a** A cBioPortal /TCGA-based analysis of UBR5's genomic alterations across all cancers deposited in the databases (240 studies and 78,404 cancer samples). **b** Relative mRNA expression levels of healthy individuals, patients with OC and those with recurrent OC (normal  $n=3$ , primary  $n=541$ , recurrent  $n=17$  independent samples per group), The  $P$  values shown were calculated by unpaired two-sided Student's  $t$  test without adjustments. **c** Recurrence-free survival rates of ovarian cancer patients with altered UBR5 gene cases (c/BioPortal/TCGA),  $P=0.0078$ , log rank test<sup>1</sup>.

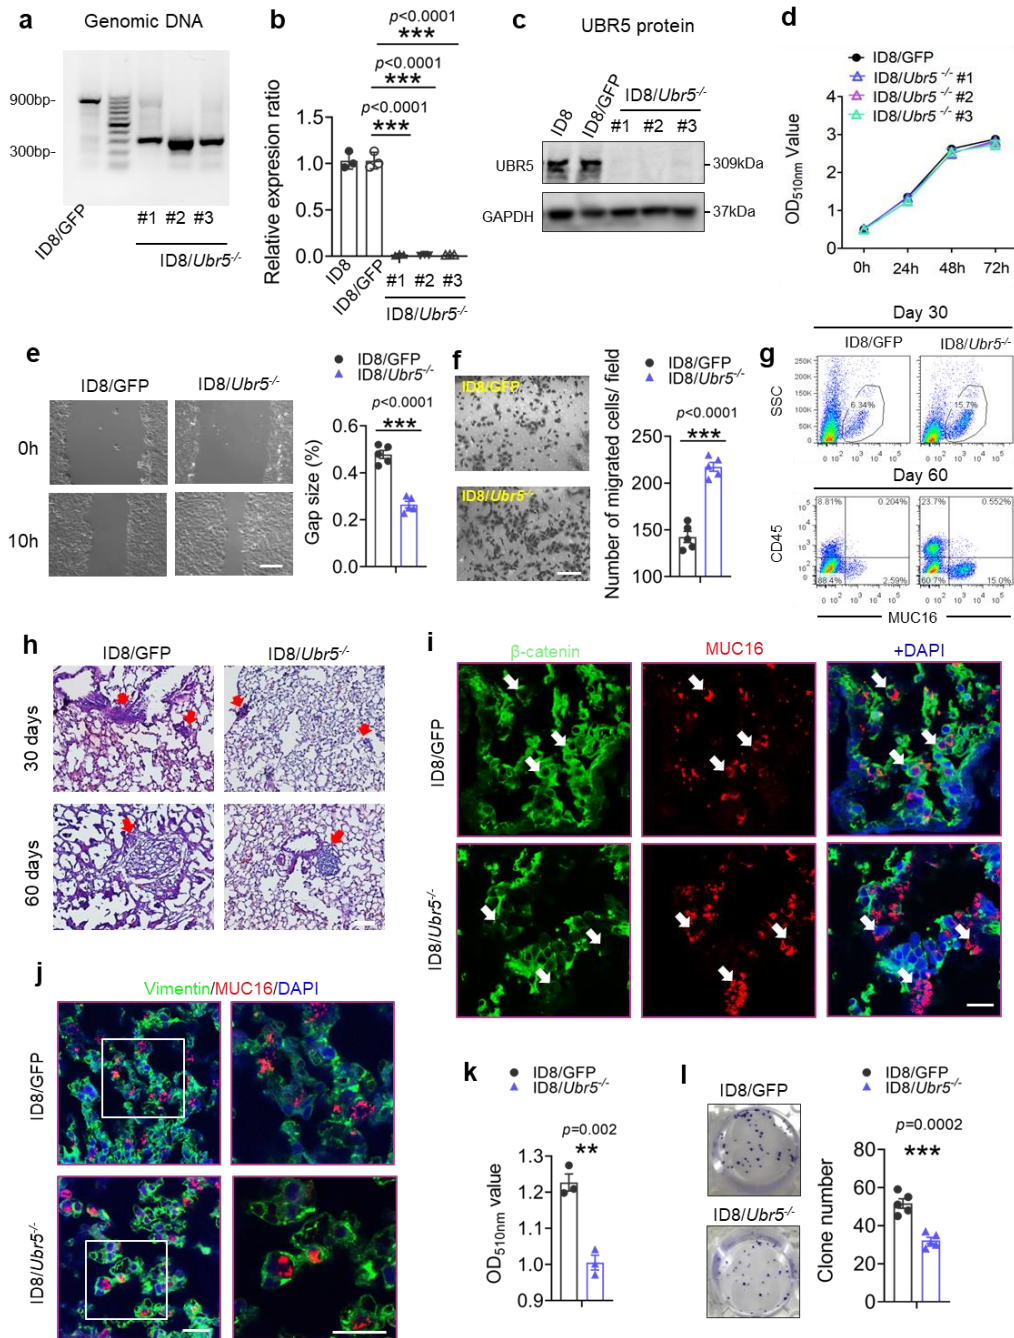

**Supplementary Fig.2: Verification of ID8/*Ubr5*<sup>-/-</sup> monoclonal cells *in vitro* and *in vivo*.**

**Figure supplementary to main Figure 1**

**a-c** Deletion of *Ubr5* gene in ID8-Muc16<sup>ecto</sup> cells via CRISPR/Cas9 was verified at genomic DNA level (**a**), mRNA level (**b**) ( $n = 3$  biologically independent samples per group), and protein level (**c**) by PCR, RT-PCR and western blot, respectively. **d** Sulforhodamine B (SRB) assay showing growth rates of ID8/GFP and ID8/*Ubr5*<sup>-/-</sup> monoclonal cells ( $n = 3$  biologically independent samples per group). Representative micrographs and quantitation of Transwell-migration assay (**e**) ( $n = 5$  biologically

independent samples per group) or wound-healing assay (**f**) ( $n=5$  biologically independent samples per group). Scale bar:  $200\mu\text{m}$ . **g-j** To evaluate spontaneous metastasis,  $5\times 10^6$  ID8 cells were i.v. injected to C57BL/6 female recipient mice. **g** Representative FACS images of Muc16<sup>+</sup> tumor cells in lung at indicated times after ID8 i.v. injection ( $n=3$  mice per group). **h** Representative images of H&E staining of lung sections showing pulmonary metastatic nodules ( $n=3$  mice per group). Scale bar:  $100\mu\text{m}$ . **i** Representative immunofluorescence (IF) images of lung sections showing  $\beta$ -catenin expression in MUC16<sup>+</sup> ID8/GFP cells, but not in MUC16<sup>+</sup> ID8/*Ubr5*<sup>-/-</sup> cells at day 30 post i.v. injection ( $n=3$  mice per group). All panels are the same magnification, scale bar:  $25\mu\text{m}$ . **j** Representative IF images of lung sections showing vimentin expression in MUC16<sup>+</sup> ID8 cells at day 60 post i.v. injection ( $n=3$  mice per group). Scale bar:  $25\mu\text{m}$ . **k** Cell adhesion assay with  $1\text{E}^5$  ID8 cells ( $n=3$  biologically independent samples per group). **l** Representative images and quantified values of clonogenic assay with 50 cells /well ( $n=5$  biologically independent samples per group). All data are representative of at least two independent experiments with similar results. Data are presented as mean  $\pm$  SEM, unpaired two-sided Student's *t* test with no correction for multiple comparison, \*\* $P < 0.01$ , \*\*\* $P < 0.001$ . Source data are provided as a Source Data file.

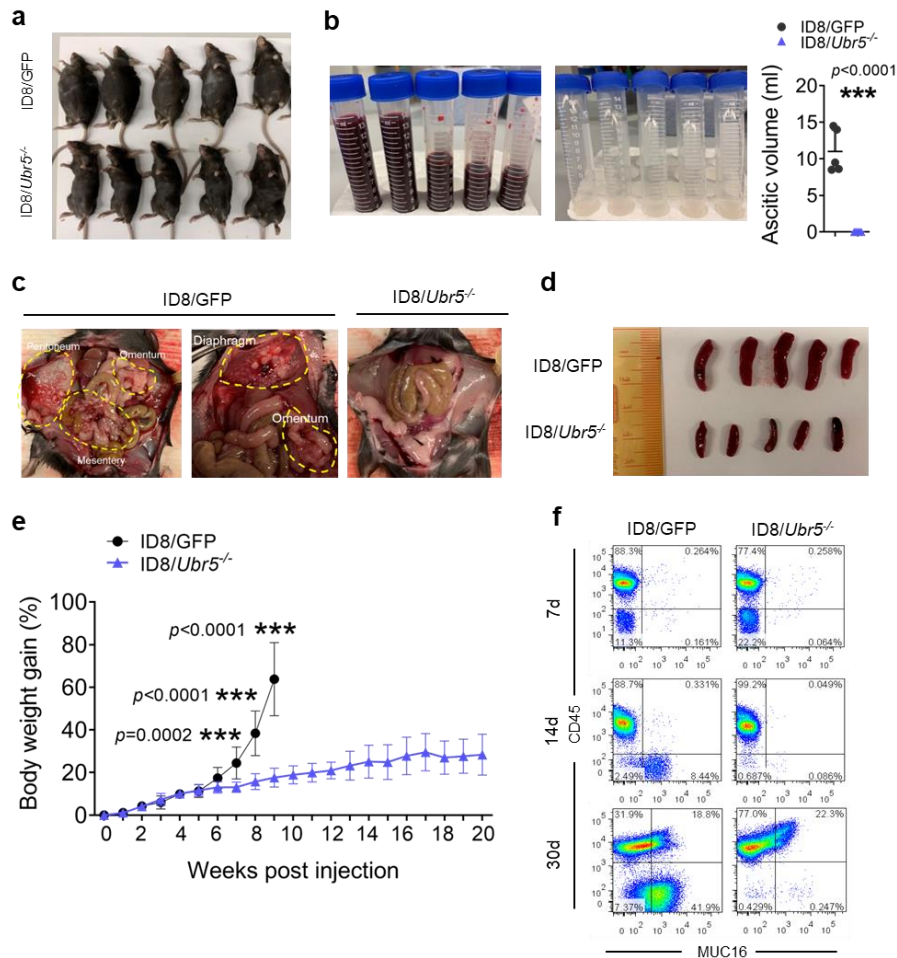

**Supplementary Fig.3: Attenuated tumor growth and peritoneal implantation of ID8/Ubr5<sup>-/-</sup>. Figure supplementary to main Figure 1**

**a-e** An orthotopic syngeneic mouse model by implanting  $1 \times 10^6$  ID8 cells into left ovarian bursa of C57BL/6 recipient mice. Mice were euthanized at 8 weeks after tumor implantation. **a** Representative images of tumor bearing mice. **b** Representative images of malignant ascites, and the volumes of ascetic fluid were measured ( $n=5$  mice per group), data are presented as mean  $\pm$  SEM, unpaired two-sided Student's *t* test. **c** Representative images of tumor implantations in omentum, peritoneum, mesentery and diaphragm. **d** Reduced splenomegaly in bearing mice. **e** Mouse body weights were monitored twice a week, and ascites generation in ID8/Ubr5<sup>-/-</sup> bearing mice expressed as percent weight gain (ID8/GFP  $n=18$ , ID8/Ubr5<sup>-/-</sup>  $n=13$  biologically independent samples per group), data are presented as mean  $\pm$  SD, unpaired two-sided Student's *t* test. **f** Representative FACS images of Muc16<sup>+</sup> CD45<sup>-</sup> tumor cells retrieved from peritoneal ascites at indicated times after i.p. injection. All data are representative of at least two independent experiments with similar results. \*\*\* $P < 0.001$ . Source data are provided as a Source Data file.

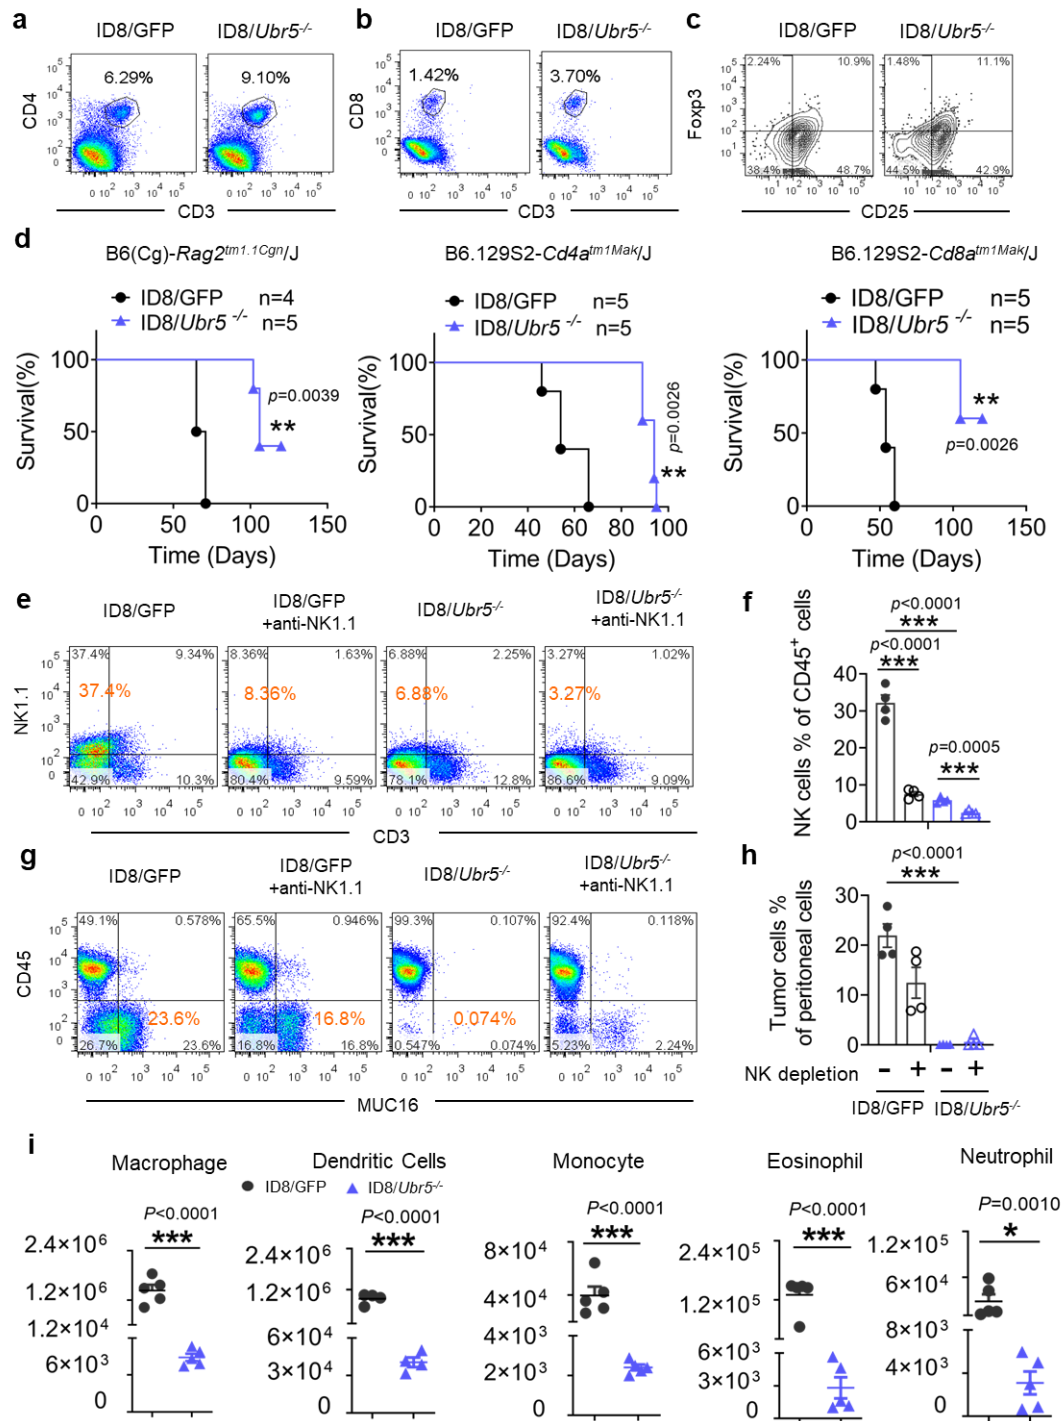

**Supplementary Fig.4: Lack of adaptive immunity involvement but strong reduction of macrophages in the tumor microenvironment of ID8/*Ubr5*<sup>-/-</sup>. Figure supplementary to main Figure 2**

**a-b** More CD4<sup>+</sup> / CD8<sup>+</sup> T cells infiltrated into peritoneal cavity at 1week post tumor implantation in ID8/*Ubr5*<sup>-/-</sup> bearing mice. Representative FACS images of peritoneal

CD4<sup>+</sup> T cells and CD8<sup>+</sup> T cells gated on CD45<sup>+</sup> cells. **c** Representative FACS images of Foxp3<sup>+</sup>CD25<sup>+</sup> regulatory T cells gated on CD45<sup>+</sup> CD3<sup>+</sup> CD4<sup>+</sup> cells. **d** Survival in *Rag2*<sup>-/-</sup>, CD4-deficient and CD8-deficient mice bearing ID8 tumors (*n*=4-5 mice per group), log rank test. Data are representative of at least two independent experiments with similar results. **e-f** Representative FACS images and quantification of infiltrated CD3<sup>+</sup>NK1.1<sup>+</sup> NK cells (*n*=4 mice per group). **g-h** Representative FACS images and quantification of Muc16<sup>+</sup> CD45<sup>-</sup> tumor cells in peritoneal cavity (*n*=4 mice per group). **i** Reduced infiltration of myeloid cell population in ID8/*Ubr5*<sup>-/-</sup> bearing mice. The amount of macrophages (F4/80<sup>+</sup>CD11b<sup>+</sup>Siglec F<sup>-</sup>Ly6C<sup>-</sup>), Monocytes (F4/80<sup>+</sup>CD11b<sup>+</sup> Ly6C<sup>+</sup> Siglec F<sup>-</sup>) Eosinophils (Siglec F<sup>+</sup>F4/80<sup>+</sup>), Neutrophils (F4/80<sup>-</sup> Siglec F<sup>-</sup>Ly6G<sup>+</sup>Ly6C<sup>+</sup>), dendritic cells (CD11c<sup>+</sup>MHCII<sup>+</sup>) in peritoneal cavity (*n*=5 mice per group). All data are representative of at least two independent experiments with similar results. Data are presented as mean ± SEM, unpaired two-sided Student's *t* test with no correction for multiple comparison, \*\**P* < 0.01, \*\*\**P* < 0.001. Source data are provided as a Source Data file.

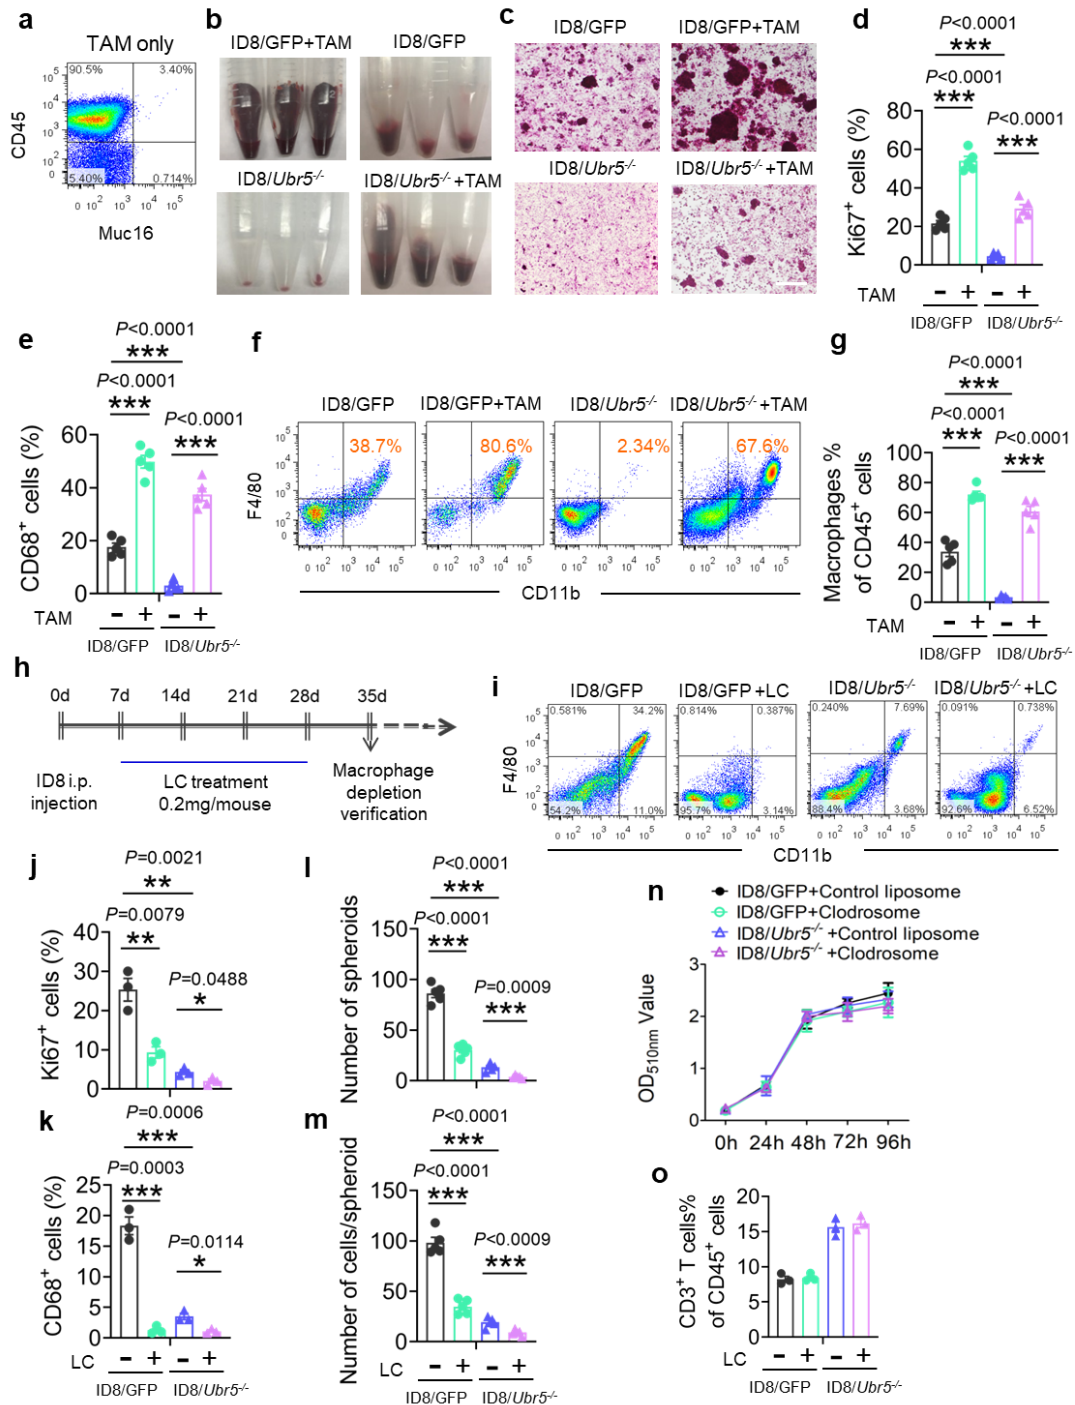

**Supplementary Fig.5: Impaired macrophage recruitment caused by *Ubr5* deficiency attenuated peritoneal OC growth. Figure supplementary to main Figure 3**

a Injection of TAMs alone did not produce tumors. Peritoneal cells were retrieved at day 50 post TAMs *i.p.* injection ( $n=5$  mice per group). **b-g** Adoptive transfer of TAMs boosted ID8/*Ubr5*<sup>-/-</sup> tumor growth to control levels in mice. Peritoneal washes were



collected at day 30 after tumor implantation from ID8 bearing mice with or without TAMs administration. **b** Representative pictures of peritoneal lavages obtained from ID8 bearing mice ( $n=3$  mice per group). **c** Spheroids from peritoneal washes were harvested and evaluated by H&E staining ( $n=3$  mice per group and an average of 5 fields acquired from each sample). Scale bars:  $100\mu\text{m}$ . **d-e** Quantification of  $\text{Ki67}^+$  and  $\text{CD68}^+$  cells in spheroids ( $n=5$  mice per group and 10 confocal images acquired from each sample). **f** Representative FACS images of infiltrated TAMs in peritoneal cavity. **g** Proportion of  $\text{CD11b}^+\text{F4/80}^+$  macrophages on  $\text{CD45}^+$  infiltrating cells were quantified ( $n=5$  mice per group). **h** Schematics for LC treatment. **i** Representative FACS images of infiltrated  $\text{CD11b}^+\text{F4/80}^+$  macrophages in peritoneal cavity. **j-k** Quantification of  $\text{Ki67}^+$  cells and  $\text{CD68}^+$  cells (in spheroid populations) ( $n=3$  mice per group and 10 confocal images acquired from each sample). **l-m** Quantification of total number and size of spheroids retrieved from peritoneal cavity ( $n=5$  mice per group and an average of 10 fields acquired from each sample). **n** SRB assay showing proliferation rates of ID8 cells in response to  $10\mu\text{g/ml}$  of LC at different time points ( $n=3$  biologically independent samples per group). **o** Quantification of infiltrated  $\text{CD3}^+$  T cells in peritoneal cavity ( $n=3$  mice per group). All data are representative of at least two independent experiments with similar results. Data are presented as mean  $\pm$  SEM, unpaired two-sided Student's  $t$  test with no correction for multiple comparison,  $*P < 0.05$ ,  $**P < 0.01$ ,  $***P < 0.001$ . Source data are provided as a Source Data file.

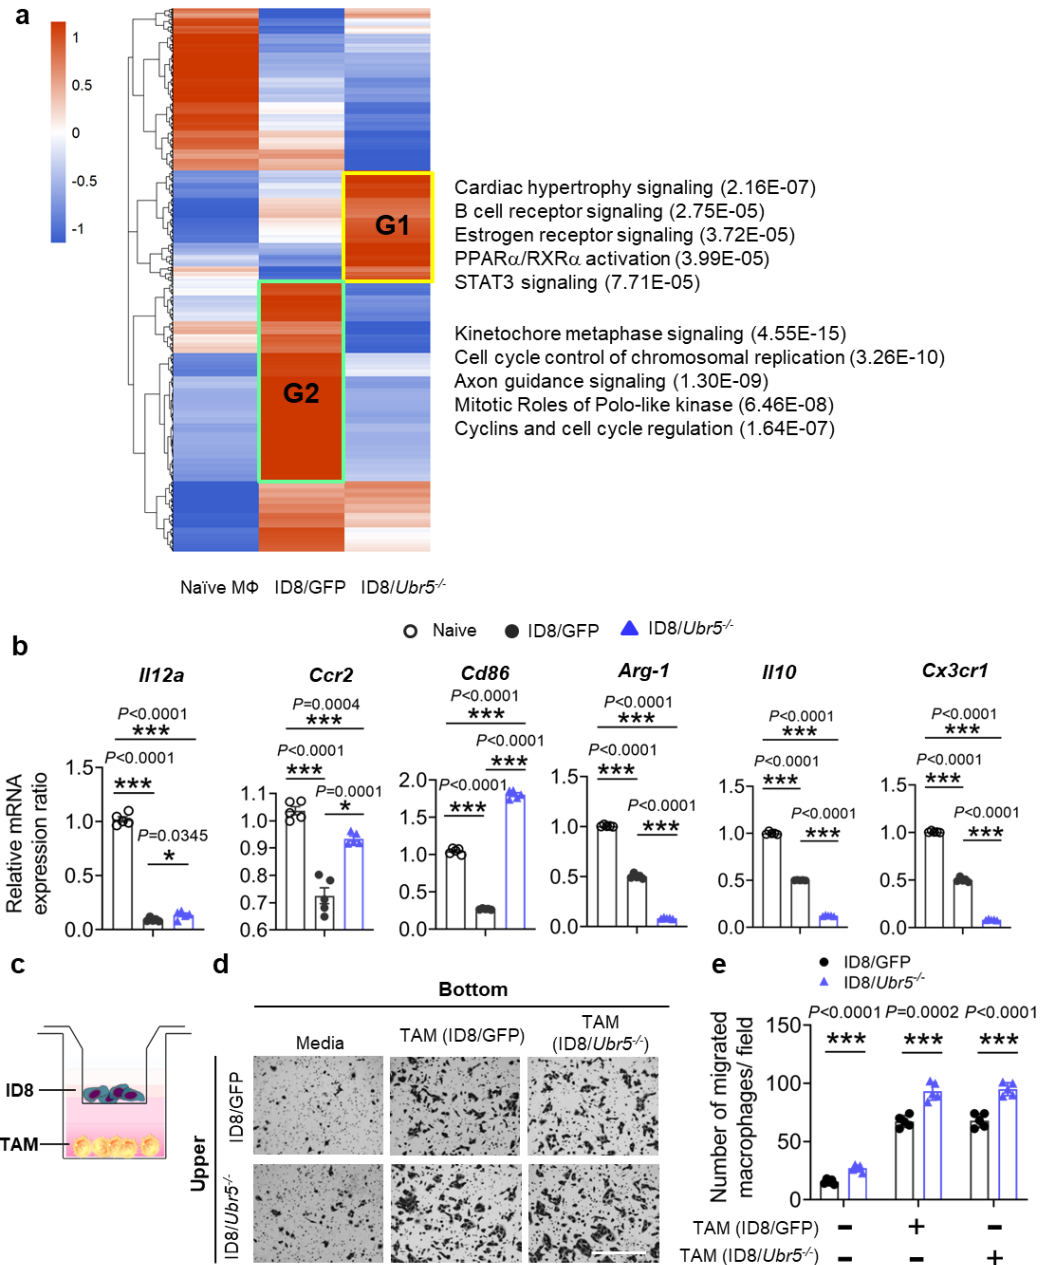

**Supplementary Fig.6: UBR5-regulated, paracrine TAM immunosuppressive activities. Figure supplementary to main Figure 4**

**a** RNA-seq analysis of peritoneal macrophages from non-tumor-bearing mice (naïve), ID8/GFP tumor-bearing mice and *Ubr5*<sup>-/-</sup> tumor bearing mice. All genes with statistically significant expression changes ( $\log_2$  Fold Change>1) are included in this “heatmap”, highlighting two groups of genes (G1 and G2) that were activated exclusively in *Ubr5*<sup>-/-</sup> tumor or WT tumor carrying mouse-derived TAMs, respectively. The activated pathways in G1 and G2 based on Ingenuity Pathway Analysis (IPA) are illustrated. Numbers in the brackets indicate the degree of statistical significance. **b**

TAMs were isolated from tumor bearing mice on 5 weeks after tumor implantation and subjected to qRT-PCR. The mRNA levels of M1/M2 subtype markers were evaluated ( $n=5$  biologically independent samples per group). **c-e** Isolated TAMs from ID8 tumor bearing mice were seeded at the bottom and  $2 \times 10^4$  starved ID8 cells were loaded into Transwell chamber for 24hrs. **c** Schematics of migration Transwell assay. **d-e** Representative micrographs and quantitative values of migrated ID8 cells ( $n=5$  biologically independent samples per group) Scale bars: 200 $\mu$ m. Data in **b-e** are representative of three independent experiments with similar results. Data are presented as mean  $\pm$  SEM, unpaired two-sided Student's *t* test with no correction for multiple comparison, \*\*\* $P < 0.001$ . Source data are provided as a Source Data file.

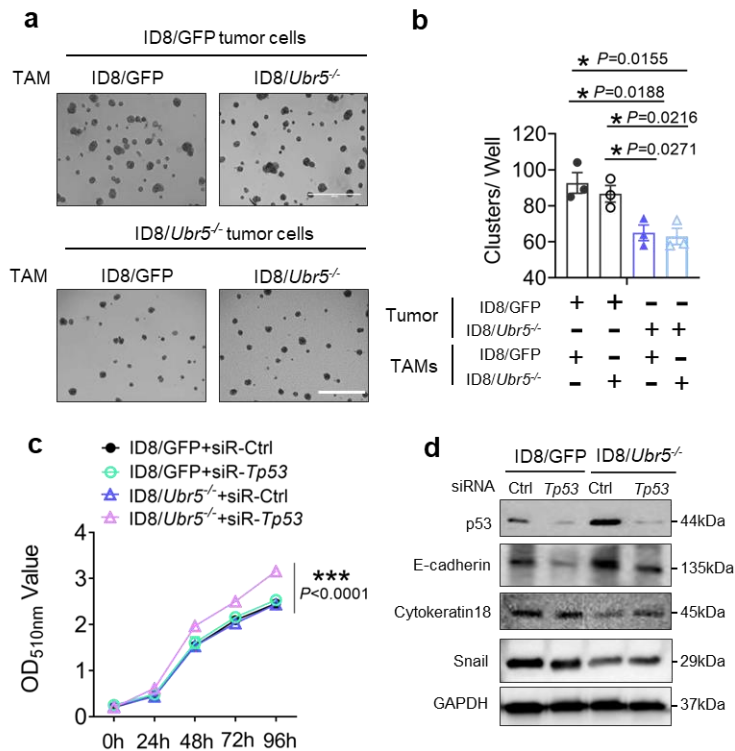

**Supplementary Fig.7: UBR5-regulated spheroid formation and p53 expression in ID8. Figure supplementary to main Figure 5**

**a-c** TAMs isolated from ID8 bearing mice were co-cultured with ID8 in a 3D coculture system. **a** Representative images of spheroids. Scale bars: 400 $\mu$ m. **b** The number of spheroids was statistically evaluated ( $n=3$  biologically independent samples per group). **c** knockingdown *Tp53* in ID8/*Ubr5*<sup>-/-</sup> promoted cell proliferation. Sulforhodamine B (SRB) assay showing growth rates of ID8/*Ubr5*<sup>-/-</sup> after p53 silencing ( $n=3$  biologically independent samples per group). **d** Western blotting showing the expression of E-cadherin, cytokeatin 18, and Snail after *Tp53* knocking down in ID8 cells. All data are representative of three independent experiments with similar results. Data are presented as mean  $\pm$  SEM, unpaired two-sided Student's *t* test with no correction for multiple comparison, \* $P < 0.05$ , \*\*\* $P < 0.001$ . Source data are provided as a Source Data file.

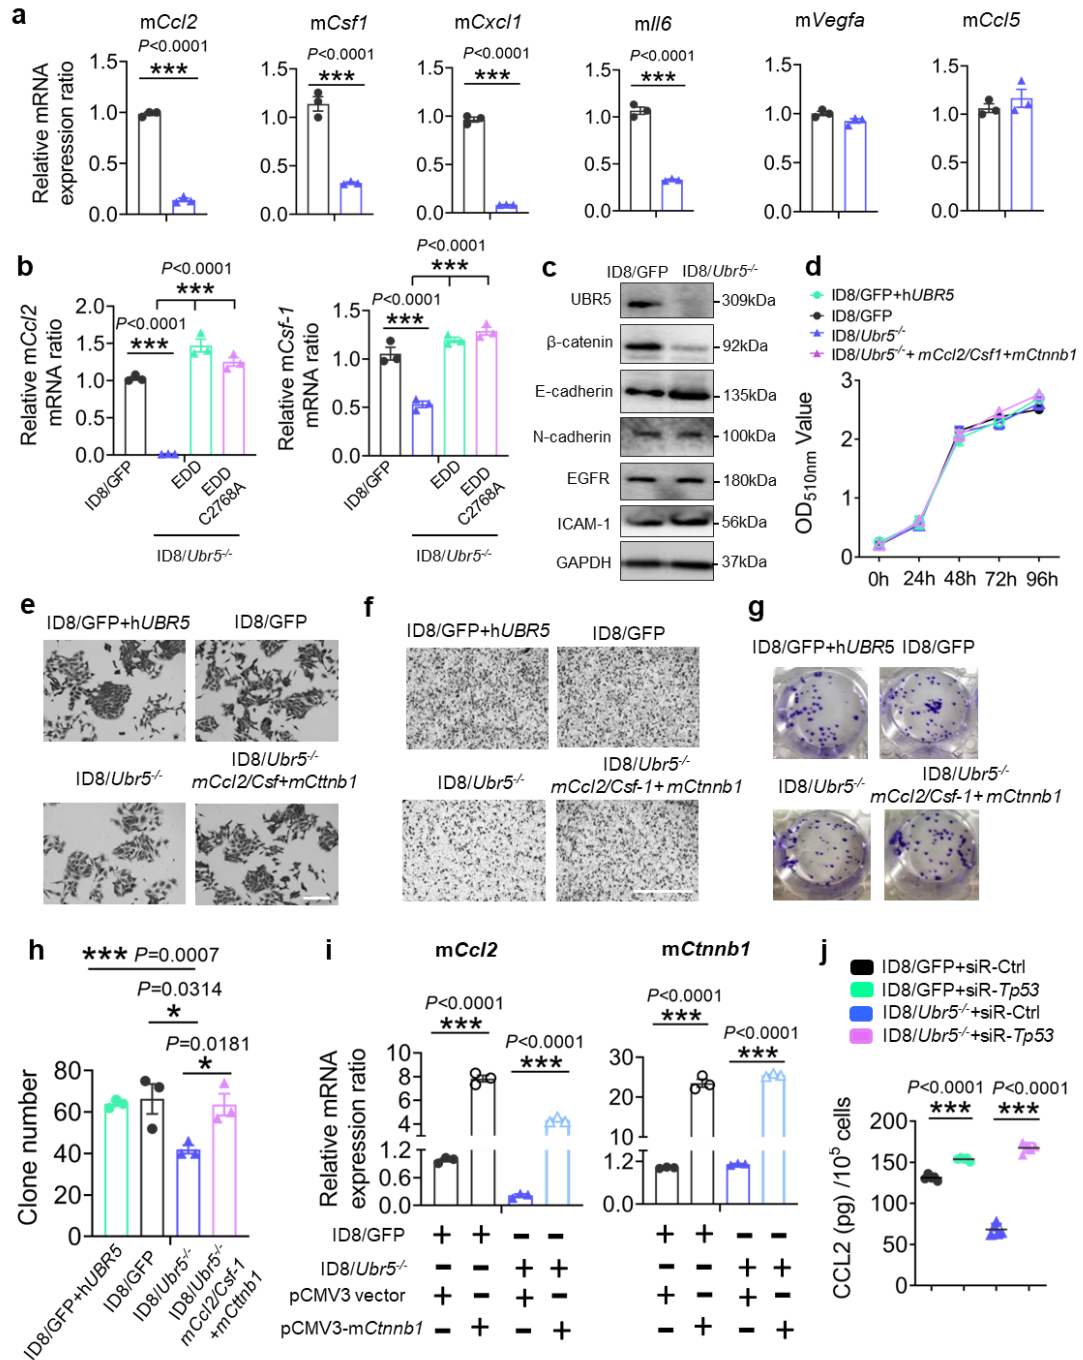

**Supplementary Fig. 8: *Ubr5* deficiency reduces paracrine crosstalk between OC and TAMs, and decreases cell-autonomous  $\beta$ -catenin signaling. Figure supplementary to main Figure 6**

**a** The mRNA levels of genes involved in OC-TAMs crosstalk (*Ccl2*, *Csf1*, *Cxcl1*, *Il6*, *Vegfa*, and *Ccl5*) in ID8 cells were evaluated by qRT-PCR ( $n=3$  biologically independent samples per group). **b** mRNA expression of *mCcl2* and *mCsf-1* in ID8/GFP, ID8/*Ubr5*<sup>-/-</sup>, EDD or EDD-C2768A reconstituted ID8/*Ubr5*<sup>-/-</sup> cells was

evaluated by qRT-PCR ( $n=3$  biologically independent samples per group). **c** Protein expression of  $\beta$ -catenin, E-cadherin, N-cadherin, and EGRF were assessed by Western Blot. **d** Sulforhodamine B (SRB) assay showing growth rates ( $n=3$  biologically independent samples per group). **e** Representative micrographs of cell morphology. Scale bars: 200 $\mu$ m. **f** Transwell migration assay of peritoneal macrophages in the presence of ID8 cells. Scale bars: 400 $\mu$ m. **g-h** Representative images and quantified values of clonogenic assay with 100 cells/well ( $n=3$  biologically independent samples per group). **i** Transient transfection of *Ctnnb1* in ID8 cells induced *Ccl2* mRNA expression in ID8 cells ( $n=3$  biologically independent samples per group). **j** Knocking down *Tp53* in ID8 cells increased CCL2 production ( $n=5$  biologically independent samples per group). All data are representative of at least two independent experiments with similar results. Data are presented as mean  $\pm$  SEM, unpaired two-sided Student's *t* test with no correction for multiple comparison, \* $P < 0.05$ , \*\*\* $P < 0.001$ . Source data are provided as a Source Data file.

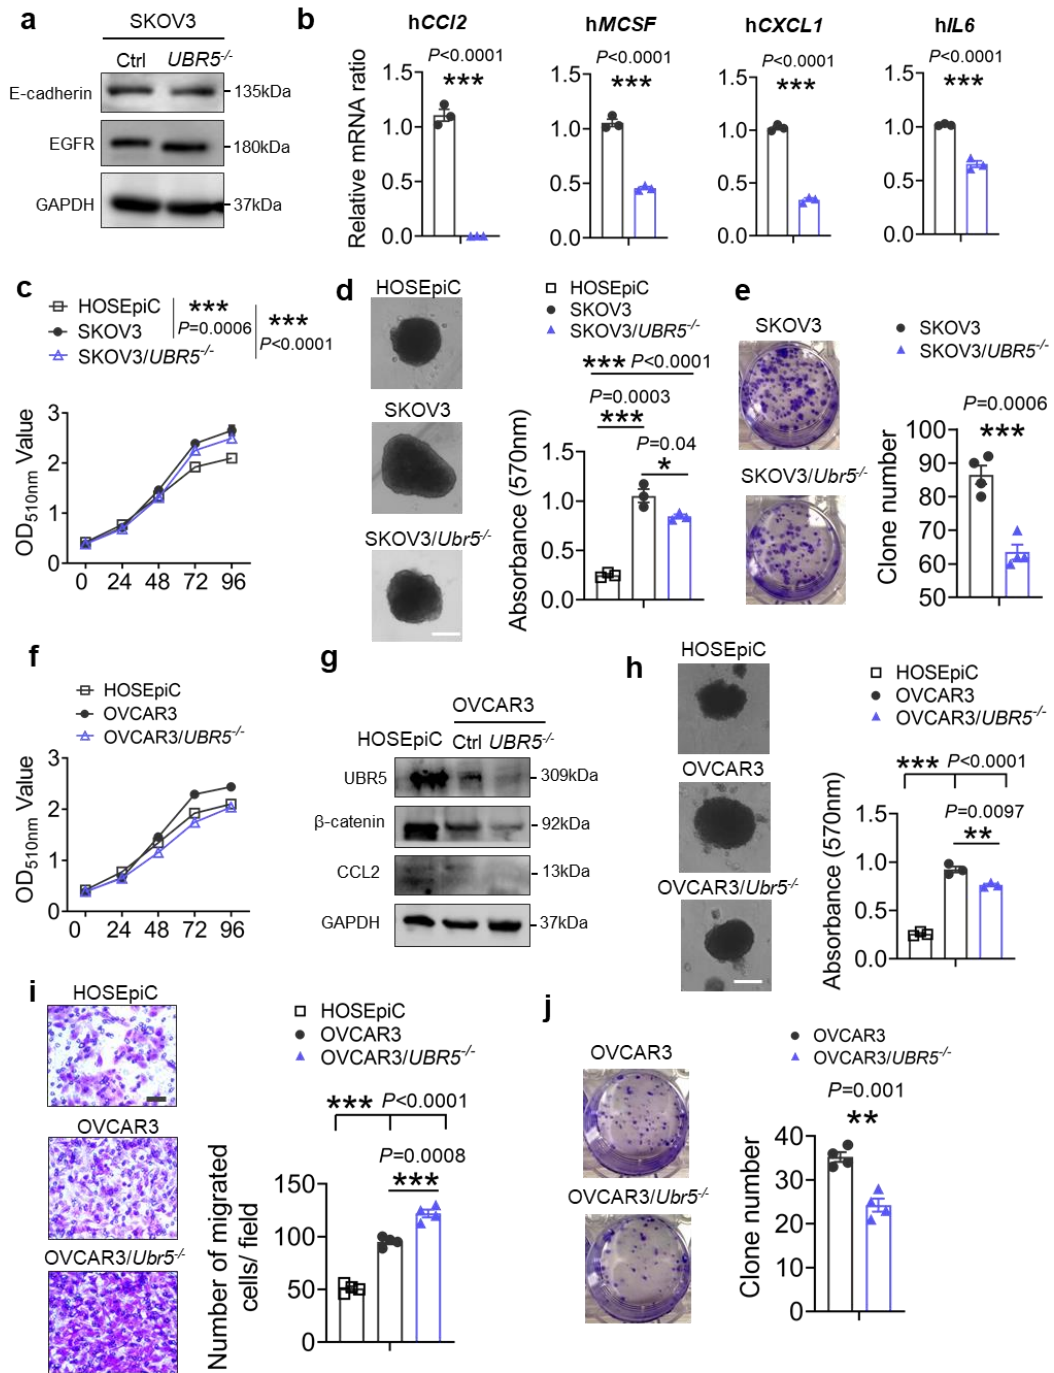

**Supplementary Fig.9: *UBR5* depletion leads to reduced macrophage infiltration in human ovarian cancer. Figure supplementary to main Figure 7**

**a** Protein expression of E-cadherin and EGFR were evaluated by western blot. **b** Reduced expression of *CCL2*, *MCSF*, *CXCL1*, *IL6* in SKOV3/*UBR5*<sup>-/-</sup> were determined at mRNA level by qRT-PCR (*n* = 3 biologically independent samples per group). **c** Sulforhodamine B (SRB) assay showing growth rates of HOSEpiC vs SKOV3 cells (*n* = 3 biologically independent samples per group). **d** Representative images and quantification of SKOV3 spheroid formation (*n* = 3 biologically

independent samples per group). Scale bars: 200 $\mu$ m. **e** Representative micrographs and quantitation of clonogenic assay for SKOV3 ( $n=4$  biologically independent samples per group). **f** Sulforhodamine B (SRB) assay showing growth rates of HOSEpiC vs OVCAR3 cells ( $n=3$  biologically independent samples per group). **g** Deletion of *UBR5* in OVCAR3 cells was verified by western blot. Reduced  $\beta$ -catenin in OVCAR3/*UBR5*<sup>-/-</sup> was determined at protein level, human ovarian surface epithelial cells HOSEpiC were used as control. **h** Representative images and quantification of OVCAR3 spheroid formation ( $n=3$  biologically independent samples per group). Scale bars: 200 $\mu$ m. **i** Representative micrographs and quantitation of Transwell-migration assay for OVCAR3. Scale bars: 50 $\mu$ m ( $n=4$  biologically independent samples per group and an average of 5 fields acquired from each sample). **j** Representative micrographs and quantitation of clonogenic assay for OVCAR3 ( $n=4$  biologically independent samples per group). All data are representative of at least two independent experiments with similar results. Data are presented as mean  $\pm$  SEM, unpaired two-sided Student's *t* test with no correction for multiple comparison, \*\**P* < 0.01, \*\*\**P* < 0.001. Source data are provided as a Source Data file.

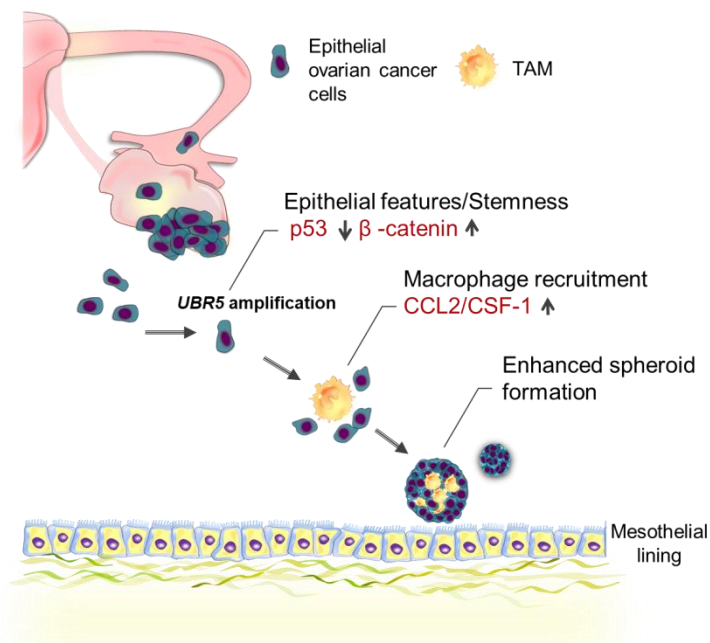

**Supplementary Fig.10: Schematic illustration of how tumor-derived UBR5 promotes ovarian cancer progression. Figure supplementary to Discussion**



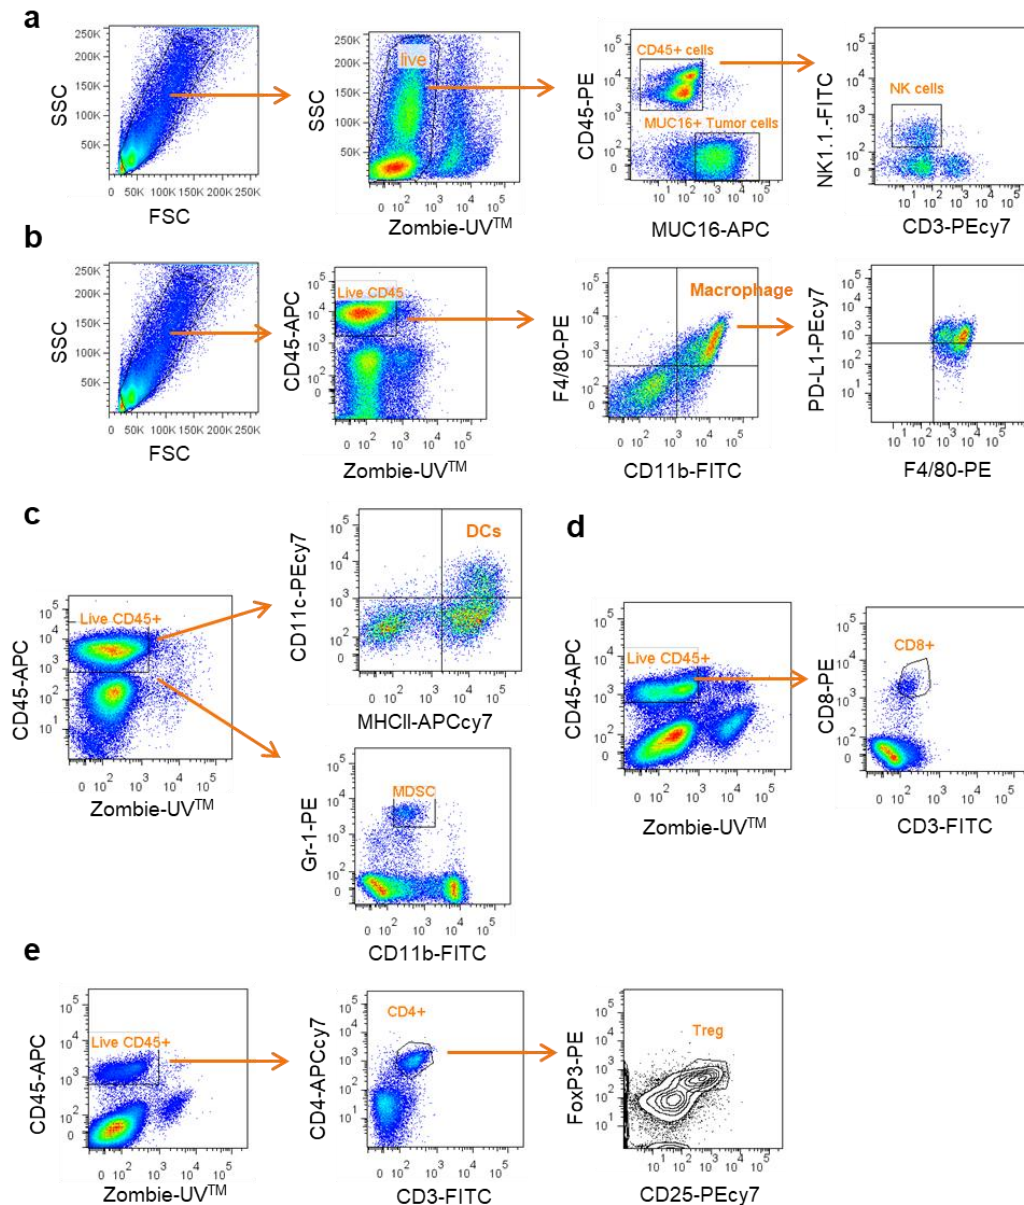

**Supplementary Fig.11: FACS Gating strategy for tumor cells and immune subsets from peritoneum.**

Following gating to live cells by Zombie-UV fixable viability stain, ID8 tumor cells were gated for CD45<sup>+</sup>MUC16<sup>+</sup> cells presented on Fig.1i, 2d,3a, f, Supplementary Fig.2g, 3f, 4g,h, 5a; infiltrating immune cells were gated for CD45<sup>+</sup> cells. NK cells were identified as CD45<sup>+</sup>NK1<sup>+</sup>CD3<sup>-</sup> presented on Supplementary Fig.4e, f (a). Macrophages were identified as CD45<sup>+</sup>CD11b<sup>+</sup>F4/80<sup>+</sup> presented on Fig2e, f, 3e, 4c, d, 7i, Supplementary Fig.5f, g, and I (b); DCs and MDSCs were identified as CD45<sup>+</sup>MHCII<sup>+</sup>CD11c<sup>+</sup>, CD45<sup>+</sup>CD11b<sup>+</sup>Gr-1<sup>+</sup>, respectively presented in Supplementary Fig.4i (c). CD8<sup>+</sup> T cells were gated as CD45<sup>+</sup>CD3<sup>+</sup>CD8<sup>+</sup> presented in Fig.2b, Supplementary Fig.4b (d). CD4<sup>+</sup> T cells were gated as CD45<sup>+</sup>CD3<sup>+</sup>CD4<sup>+</sup> and Tregs were gated on CD4<sup>+</sup> T cells as Foxp3<sup>+</sup>CD25<sup>+</sup> (CD4<sup>+</sup>T) cells presented in Fig2a, c, Supplementary Fig.4a, c (e).

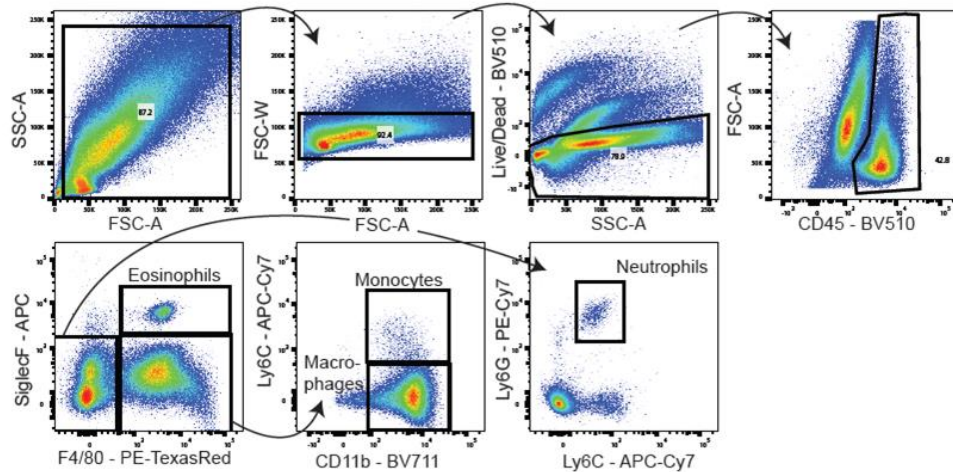

**Supplementary Fig.12: FACS Gating strategy for counting the absolute number of myeloid cell population from peritoneum of ID8 tumor bearing mice.**

Following gating to include singlets (FSC-H vs. FSC-A) and live cells by Live/Dead-BV510, tumor infiltrating myeloid cells were gated for CD45<sup>+</sup> cells. Macrophages were identified as F4/80<sup>+</sup>CD11b<sup>+</sup>Siglec F<sup>-</sup>Ly6C<sup>-</sup>; Monocytes were identified as F4/80<sup>+</sup>CD11b<sup>+</sup> Ly6C<sup>+</sup> Siglec F<sup>-</sup>; Eosinophils were identified as Siglec F<sup>+</sup> F4/80<sup>+</sup>, Neutrophils were identified as F4/80<sup>-</sup> Siglec F<sup>-</sup>Ly6G<sup>+</sup>Ly6C<sup>+</sup> presented in Supplementary Fig4i.

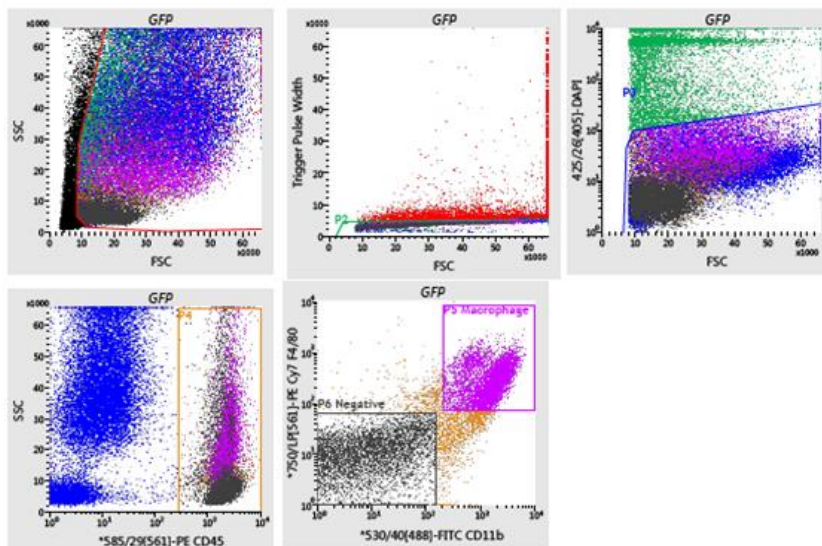

**Supplementary Fig.13: Gating strategy for tumor associated macrophages (TAMs) sorting from peritoneum of ID8 tumor bearing mice. Figure supplementary to Figure 3,4g and 7k.**

Following gating to include singlets (FSC vs. SSC) and live cells by DAPI, tumor associated macrophages were identified as F4/80<sup>+</sup>CD11b<sup>+</sup> cells and sorted with Becton-Dickinson Influx.

**Supplementary Table 1: Complete blood count (CBC) and liver function parameters in tumor bearing mice with intrabursal injection of ID8. Table supplementary to main Figure 1**

| <b>Complete blood count</b> | ID8/GFP       | ID8/ <i>Ubr5</i> <sup>-/-</sup> | <i>p</i> value | Reference range |
|-----------------------------|---------------|---------------------------------|----------------|-----------------|
| RBC (M/uL)                  | 10.32±0.12    | 10.45±0.16                      | n.s.           | 7.14-12.20      |
| HGB (g/dL)                  | 15.23±0.06    | 15.43±0.15                      | n.s.           | 10.8-19.2       |
| HCT (%)                     | 50.06±0.81    | 49.47±1.50                      | n.s.           | 37.2-62.0       |
| MCV (fL)                    | 48.53±0.25    | 47.77±0.59                      | n.s.           | 42.6-56.0       |
| MCH (pg)                    | 14.77±0.15    | 14.70±0.10                      | n.s.           | 11.7-16.8       |
| MCHC (g/dL)                 | 30.43±0.50    | 30.80±0.20                      | n.s.           | 24.6-35.9       |
| RDW-SD (fL)                 | 28.30±0.50    | 27.37±0.78                      | n.s.           | ----            |
| RET (%)                     | 4.13±0.09     | 3.34±0.18                       | ** (0.0024)    | 2.56-4.56       |
| PLT (K/uL)                  | 836.00±204.73 | 869.00±147.31                   | n.s.           | 565-2159        |
| PDW (fL)                    | 7.43±0.40     | 7.27±0.32                       | n.s.           | ----            |
| MPV (fL)                    | 6.17±0.38     | 5.97±0.15                       | n.s.           | 4.3-6.1         |
| WBC# (K/uL)                 | 4.90±1.32     | 5.75±0.53                       | n.s.           | 3.90-13.96      |
| NEUT (%)                    | 11.80±2.82    | 8.40±0.79                       | n.s.           | 7.36-28.59      |
| LYMPH (%)                   | 85.93±3.36    | 87.10±3.58                      | n.s.           | 61.26-87.12     |
| MONO (%)                    | 0.50±0.00     | 0.37±0.12                       | n.s.           | 2.18-11.02      |
| EO (%)                      | 1.77±0.61     | 1.93±0.57                       | n.s.           | 0.13-4.51       |
| <b>Liver chemistry</b>      |               |                                 |                |                 |
| ALP (U/L)                   | 106.33±17.24  | 105.67±8.50                     | n.s.           | 105-370         |
| ALT (U/L)                   | 32.67±15.04   | 30.67±7.37                      | n.s.           | 27-195          |
| AST (U/L)                   | 55.67±14.29   | 50.67±19.55                     | n.s.           | 54-77           |
| LDH (mg/dL)                 | 364.33±115.31 | 285.67±143.17                   | n.s.           | ----            |
| TBIL (mg/dL)                | 0.17±0.06     | 0.17±0.06                       | n.s.           | 0.2-0.6         |
| IBIL (mg/dL)                | 0.17±0.06     | 0.17±0.06                       | n.s.           | ----            |
| TP (g/dL)                   | 5.03±0.21     | 4.800±0.00                      | n.s.           | 4.8-7.2         |
| ALB (g/dL)                  | 3.20±0.10     | 3.00±0.00                       | * (0.0257)     | 2.4-4.3         |
| GLOB (g/dL)                 | 1.83±0.12     | 1.70±0.00                       | n.s.           | 1.7-2.2         |
| A/G Ratio                   | 1.73±0.06     | 1.80±0.00                       | n.s.           | ----            |
| CHOL (mg/dL)                | 73.33±2.31    | 51.33±4.93                      | ** (0.0022)    | 55-169          |
| TRIG (mg/dL)                | 123.33±22.01  | 90.67±15.82                     | n.s.           | 67-289          |

7 weeks after tumor implantation, blood samples were collected for complete blood count (CBC) and liver function test. RBC: red blood cell; HGB: hemoglobin; HCT: hematocrit; MCV: mean corpuscular volume; MCH: mean corpuscular hemoglobin; MCHC: mean corpuscular hemoglobin concentration; RDW: red blood cell distribution width; RET: reticulocyte; PLT: platelet count; PDW: platelet distribution width; MPV: mean platelet volume; WBC: white blood cell; NEUT: neutrophil; LYMPH: lymphocyte; MONO: monocyte; EO: eosinophil. ALP: alkaline phosphatase; ALT: alanine transaminase; AST: aspartate transaminase; LDH: lactate dehydrogenase; TBIL: total bilirubin; IBIL: indirect bilirubin; TP: total protein; ALB: albumin; GLOB: globulin-calculated; CHOL: cholesterol; TRIG: triglycerides. Data are presented as mean±SD. Statistical significance was assessed based on unpaired two-tailed Student's t-test, \**P* < 0.05, \*\**P* < 0.01.

**Supplementary Table 2: Complete blood count (CBC) and liver function parameters in tumor bearing mice with intraperitoneal (i.p.) injection with or w/o cisplatin treatment. Table supplementary to main Figure 8**

| Complete blood count   | PBS           |                                      |                             |         |                 |                 | Cisplatin     |                                      |                             |                |         |                |
|------------------------|---------------|--------------------------------------|-----------------------------|---------|-----------------|-----------------|---------------|--------------------------------------|-----------------------------|----------------|---------|----------------|
|                        | Average ± SD  |                                      |                             | p value |                 |                 | Average ± SD  |                                      |                             | p value        |         |                |
|                        | ID8/GFP(#1)   | ID8/ <i>Ubr5</i> <sup>-/-</sup> (#2) | ID8/GFP +h <i>UBR5</i> (#3) | #1vs #2 | #1vs# 3         | #2vs #3         | ID8/GFP(#1)   | ID8/ <i>Ubr5</i> <sup>-/-</sup> (#2) | ID8/GFP +h <i>UBR5</i> (#3) | #1vs #2        | #1vs #3 | #2 vs #3       |
| RBC (M/uL)             | 9.23±0.38     | 9.98±0.74                            | 5.09±1.40                   | n.s.    | ***<br>(0.0004) | ***<br>(<0.001) | 9.71±0.38     | 8.92±0.50                            | 8.52±1.02                   | n.s.           | n.s.    | n.s.           |
| Hemoglobin (g/dL)      | 15.00±1.4     | 14.50±0.96                           | 6.90±1.50                   | n.s.    | **<br>(0.0022)  | **<br>(0.0016)  | 13.53±1.51    | 12.00±1.49                           | 13.30±1.72                  | n.s.           | n.s.    | n.s.           |
| Hematocrit (%)         | 52.00±3.64    | 51.43±1.70                           | 25.8±4.86                   | n.s.    | **<br>(0.0012)  | ***<br>(0.0005) | 49.13±5.05    | 43.8±4.56                            | 47.9±3.56                   | n.s.           | n.s.    | n.s.           |
| MCV (fL)               | 51.53±3.23    | 49.53±1.58                           | 52.87±1.4                   | n.s.    | n.s.            | n.s.            | 49.47±2.99    | 48.13±3.56                           | 45.27±1.68                  | n.s.           | n.s.    | n.s.           |
| MCH (pg)               | 13.90±0.20    | 14.27±0.45                           | 13.70±1.04                  | n.s.    | n.s.            | n.s.            | 14.40±0.44    | 14.03±0.06                           | 14.57±0.49                  | n.s.           | n.s.    | n.s.           |
| MCHC (g/dL)            | 30.56±0.45    | 30.67±0.32                           | 28.20±2.42                  | n.s.    | n.s.            | n.s.            | 30.97±0.90    | 30.80±0.53                           | 31.33±0.76                  | n.s.           | n.s.    | n.s.           |
| RDW-SD (fL)            | 27.50±1.25    | 28.30±0.60                           | 33.03±8.23                  | n.s.    | n.s.            | n.s.            | 29.00±1.31    | 26.17±1.45                           | 27.50±0.70                  | n.s.           | n.s.    | n.s.           |
| RDW-CV (%)             | 24.63±0.56    | 24.60±0.44                           | 24.40±2.05                  | n.s.    | n.s.            | n.s.            | 24.33±0.91    | 24.03±1.30                           | 23.86±0.25                  | n.s.           | n.s.    | n.s.           |
| RET (%)                | 4.11±0.53     | 4.37±0.61                            | 7.98±0.47                   | n.s.    | ***<br>(0.0007) | **<br>(0.0012)  | 4.06±0.63     | 3.98±0.45                            | 4.78±0.68                   | n.s.           | n.s.    | n.s.           |
| PLT (K/uL)             | 849.67±151.08 | 883.00±153.52                        | 727.33±88.09                | n.s.    | n.s.            | n.s.            | 875.01±225.43 | 766.20±125.46                        | 944.07±227.58               | n.s.           | n.s.    | n.s.           |
| PDW (fL)               | 6.60±0.44     | 6.63±0.76                            | 6.70±0.10                   | n.s.    | n.s.            | n.s.            | 6.43±0.15     | 6.23±0.06                            | 6.56±0.32                   | n.s.           | n.s.    | n.s.           |
| MPV (fL)               | 5.57±0.12     | 5.67±0.16                            | 6.36±0.83                   | n.s.    | n.s.            | n.s.            | 5.60±0.17     | 5.50±0.14                            | 5.83±0.35                   | n.s.           | n.s.    | n.s.           |
| WBC# (K/uL)            | 5.13±0.58     | 4.99±0.74                            | 5.24±0.70                   | n.s.    | n.s.            | n.s.            | 4.39±0.34     | 4.31±0.07                            | 5.13±0.94                   | n.s.           | n.s.    | n.s.           |
| NEUT (%)               | 11.4±10.87    | 8.53±2.08                            | 18.83±7.54                  | n.s.    | n.s.            | n.s.            | 11.60±0.28    | 11.89±1.00                           | 10.40±0.72                  | n.s.           | n.s.    | n.s.           |
| LYMPH (%)              | 88.60±3.41    | 88.57±3.13                           | 80.00±7.54                  | n.s.    | n.s.            | n.s.            | 85.80±0.50    | 75.97±5.82                           | 85.70±0.40                  | **<br>(0.0065) | n.s.    | **<br>(0.0083) |
| MONO (%)               | 0.70±0.10     | 0.67±0.15                            | 0.60±0.20                   | n.s.    | n.s.            | n.s.            | 0.50±0.07     | 0.53±0.15                            | 0.70±0.10                   | n.s.           | n.s.    | n.s.           |
| EO (%)                 | 2.00±0.10     | 1.80±0.10                            | 1.47±0.45                   | n.s.    | n.s.            | n.s.            | 1.97±0.42     | 2.00±0.32                            | 1.40±0.55                   | n.s.           | n.s.    | n.s.           |
| <b>Liver chemistry</b> |               |                                      |                             |         |                 |                 |               |                                      |                             |                |         |                |
| ALP (U/L)              | 116.33±5.51   | 106.33±4.51                          | 73.67±9.61                  | n.s.    | **<br>(0.0026)  | **<br>(0.0060)  | 133±11.27     | 96.33±13.01                          | 120.67±9.50                 | *<br>(0.021)   | n.s.    | **<br>(0.0094) |
| ALT (U/L)              | 26.00±4.00    | 24.00±6.00                           | 33.67±15.37                 | n.s.    | n.s.            | n.s.            | 26.33±3.21    | 38.33±3.21                           | 29.67±9.01                  | *<br>(0.102)   | n.s.    | n.s.           |
| AST (U/L)              | 50.33±5.50    | 52.00±10.44                          | 50.67±6.43                  | n.s.    | n.s.            | n.s.            | 49.67±4.51    | 60.33±6.21                           | 52.00±10.44                 | n.s.           | n.s.    | n.s.           |
| LDH (mg/dL)            | 347.33±35.57  | 336.33±20.55                         | 305.67±58.29                | n.s.    | n.s.            | n.s.            | 341.00±19.16  | 353.00±116.66                        | 366.33±43.29                | n.s.           | n.s.    | n.s.           |

|              |            |            |             |      |             |             |             |             |             |      |      |      |
|--------------|------------|------------|-------------|------|-------------|-------------|-------------|-------------|-------------|------|------|------|
| TBIL (mg/dL) | 0.13±0.06  | 0.23±0.06  | 0.2±0.1     | n.s. | n.s.        | n.s.        | 0.2±0.1     | 0.2±0.00    | 0.13±0.06   | n.s. | n.s. | n.s. |
| IBIL (mg/dL) | 0.13±0.06  | 0.13±0.06  | 0.1±0.00    | n.s. | n.s.        | n.s.        | 0.13±0.06   | 0.2±0.00    | 0.2±0.1     | n.s. | n.s. | n.s. |
| TP (g/dL)    | 5.10±0.10  | 5.01±0.06  | 4.87±0.31   | n.s. | n.s.        | n.s.        | 4.97±0.15   | 5.17±0.06   | 4.93±0.15   | n.s. | n.s. | n.s. |
| ALB (g/dL)   | 3.20±0.10  | 3.30±0.10  | 2.70±0.10   | n.s. | ** (0.0036) | ** (0.0018) | 3.23±0.06   | 3.23±0.06   | 3.23±0.12   | n.s. | n.s. | n.s. |
| GLOB (g/dL)  | 1.77±0.12  | 1.87±0.06  | 1.77±0.06   | n.s. | n.s.        | n.s.        | 1.80±0.10   | 1.93±0.06   | 1.83±0.12   | n.s. | n.s. | n.s. |
| A/G Ratio    | 1.77±0.12  | 1.87±0.06  | 1.70±0.17   | n.s. | n.s.        | n.s.        | 1.83±0.12   | 1.67±0.06   | 1.77±0.06   | n.s. | n.s. | n.s. |
| CHOL (mg/dL) | 70.00±8.54 | 66.33±8.39 | 86.67±25.00 | n.s. | n.s.        | n.s.        | 72.33±4.11  | 74.67±10.97 | 76.00±12.77 | n.s. | n.s. | n.s. |
| TRIG (mg/dL) | 78.00±8.72 | 84.00±9.16 | 75.67±12.34 | n.s. | n.s.        | n.s.        | 82.67±15.01 | 87.33±9.71  | 77.67±22.14 | n.s. | n.s. | n.s. |

Blood samples were collected 5 weeks after tumor inoculation (1 week following discontinuation of cisplatin treatment) for CBC and LFT test. Data are presented as mean±SD. Statistical significance was assessed based on unpaired two-tailed Student's t-test, \* $P < 0.05$ , \*\* $P < 0.01$ , \*\*\* $P < 0.001$

**Supplementary Table 3: Demographic characteristics of patients with epithelial ovarian cancer. Table supplementary to main Figure 7**

| Characteristic                 | No. of patients<br>(n=50) | Expression of UBR5<br>(IRS) |      |       | P     |
|--------------------------------|---------------------------|-----------------------------|------|-------|-------|
|                                |                           | 0-3                         | 4--6 | 8--12 |       |
| Age at diagnosis (years)       |                           | 0-3                         | 4--6 | 8--12 |       |
| Mean                           | 53                        |                             |      |       |       |
| Media                          | 52.5                      |                             |      |       |       |
| Range                          | 28-77                     |                             |      |       |       |
| <b>FIGO stage</b>              |                           |                             |      |       | 0.449 |
| I A or I C                     | 9 (18%)                   | 4                           | 2    | 3     |       |
| II                             | 5 (10%)                   | 3                           | 1    | 1     |       |
| IIIA or IIIB                   | 3 (6%)                    | 2                           | 1    | 0     |       |
| IIIC                           | 17 (34%)                  | 8                           | 7    | 2     |       |
| IV                             | 10 (20%)                  | 8                           | 2    | 0     |       |
| Unknown                        | 6 (12%)                   | 5                           | 0    | 1     |       |
| <b>Histology Type</b>          |                           |                             |      |       | 0.323 |
| Seruous adenocarcinoma         | 29 (58%)                  | 16                          | 8    | 5     |       |
| Mucoid adenocarcinoma          | 8 (16%)                   | 6                           | 0    | 2     |       |
| Clear cell adenocarcinoma      | 10 (20%)                  | 5                           | 1    | 4     |       |
| Endometrioid<br>adenocarcinoma | 2 (4%)                    | 2                           | 0    | 0     |       |
| <b>Primary tumor size (cm)</b> |                           |                             |      |       | 0.163 |
| <5                             | 16                        | 12                          | 3    | 1     |       |
| ≥5                             | 34                        | 16                          | 11   | 7     |       |
| <b>Debulking status</b>        |                           |                             |      |       | 0.257 |
| No residual                    | 27                        | 15                          | 5    | 7     |       |
| Regional recurrence            | 13                        | 5                           | 7    | 1     |       |
| Never disease free             | 6                         | 4                           | 1    | 1     |       |
| Unknown                        | 4                         | 2                           | 2    | 0     |       |

The differences in demographic characteristics of OC patients were analyzed by the  $\chi^2$  test.

**Supplementary Table 4: Antibody list.**

| Antibody name                    | Company                | Host Species | Cat No.    | Usage  | Dilution |
|----------------------------------|------------------------|--------------|------------|--------|----------|
| UBR5/EDD                         | Novus bio              | Rabbit       | NB100-1591 | WB     | 1:500    |
| EDD                              | Santa Cruz             | Goat         | sc-9562    | IHC    | 1:500    |
| GAPDH                            | Santa Cruz             | Rabbit       | sc-25778   | WB     | 1:1000   |
| $\beta$ -Catenin                 | Cell signaling         | Rabbit       | 9562       | WB     | 1:500    |
| Cytokeratin 18                   | Santa Cruz             | Mouse        | sc-51582   | WB     | 1:500    |
| $\beta$ -Catenin                 | Santa Cruz             | Mouse        | sc-7963    | IF     | 1:500    |
| CA125 (MUC16)                    | Invitrogen             | Rabbit       | MA5-32321  | IF     | 1:200    |
| Vimentin                         | Santa Cruz             | Mouse        | sc-6260    | IF/WB  | 1:200    |
| ZEB1                             | Novus bio              | Rabbit       | NBP1-05987 | WB     | 1:500    |
| ZEB2                             | Santa Cruz             | Rabbit       | sc-48789   | WB     | 1:500    |
| PARP                             | Cell signaling         | Rabbit       | 9542S      | WB     | 1:400    |
| P53                              | R&D                    | Mouse        | MAB1355    | WB     | 1:200    |
| P53                              | Santa Cruz             | Mouse        | sc-126     | WB     | 1:400    |
| Snail                            | Cell signaling         | Rabbit       | 3879       | WB     | 1:500    |
| HDAC1                            | Santa Cruz             | Mouse        | sc-81598   | WB     | 1:500    |
| E-cadherin                       | Novus bio              | Mouse        | NBP2-19051 | WB     | 1:400    |
| N-cadherin                       | Cell signaling         | Rabbit       | 4061       | WB     | 1:200    |
| EGF Receptor                     | Cell signaling         | Rabbit       | 2232       | WB     | 1:500    |
| ICAM-1                           | Santa Cruz             | Mouse        | sc-107     | WB     | 1:500    |
| CCL2/MCP-1                       | Invitrogen             | Mouse        | MA5-17040  | WB     | 1:200    |
| Ki67                             | Vector<br>Laboratories | Rabbit       | VP-RM04    | IF     | 1:100    |
| CD68                             | Santa Cruz             | Mouse        | sc-20060   | IF/IHC | 1:100    |
| CD3-FITC                         | Biolegend              | Rat          | 100204     | FACS   | 1:200    |
| CD3-PE/Cyanine7                  | Biolegend              | Rat          | 100220     | FACS   | 1:200    |
| CD45-APC/Cyanine7                | Biolegend              | Rat          | 103116     | FACS   | 1:200    |
| CD45-BV510                       | Biolegend              | Rat          | 103138     | FACS   | 1:200    |
| CD8a-PE                          | Biolegend              | Rat          | 100708     | FACS   | 1:200    |
| CD4-APC/Cyanine7                 | Biolegend              | Rat          | 100414     | FACS   | 1:200    |
| CD11b-FITC                       | Biolegend              | Rat          | 101206     | FACS   | 1:200    |
| CD11b-BV711                      | Biolegend              | Rat          | 101242     | FACS   | 1:200    |
| NK1.1-FITC                       | Biolegend              | Mouse        | 108706     | FACS   | 1:200    |
| F4/80-PE                         | Biolegend              | Rat          | 123110     | FACS   | 1:200    |
| Ly6G-PE/Cyanine7                 | Biolegend              | Rat          | 127618     | FACS   | 1:200    |
| Ly6C-APC/Cyanine7                | Biolegend              | Rat          | 128026     | FACS   | 1:200    |
| CD11c-PE/Cyanine7                | Biolegend              | Rat          | 117318     | FACS   | 1:200    |
| I-A/I-E (MHCII)<br>-APC/Cyanine7 | Biolegend              | Rat          | 107628     | FACS   | 1:200    |
| CD274(PD-L1)-PE/Cyanine7         | Biolegend              | Rat          | 124313     | FACS   | 1:200    |
| Siglec F(CD170)-APC              | Biolegend              | Rat          | 155508     | FACS   | 1:200    |
| CD45-PE                          | eBioscience            | Rat          | 2-0451-82  | FACS   | 1:200    |

|                  |             |     |            |      |       |
|------------------|-------------|-----|------------|------|-------|
| CD4-PE/Cyanine7  | eBioscience | Rat | 25-0041-82 | FACS | 1:200 |
| FOXP3-PE         | eBioscience | Rat | 12-5773-82 | FACS | 1:100 |
| CD25-PE/Cyanine7 | eBioscience | Rat | 25-0251-82 | FACS | 1:200 |
| Arginase-1-PE    | eBioscience | Rat | 12-3697-82 | FACS | 1:100 |



**Supplementary Table 5: RT-PCR primer list.**

| Gene name     | Species | Forward Sequence        | Reverse Sequence        |
|---------------|---------|-------------------------|-------------------------|
| <i>Ubr5</i>   | Mouse   | CAATCACGCCGCGTTTCTT     | GTCCTTCCTGGCCTAGAGGT    |
| <i>Gapdh</i>  | Mouse   | GTCCTTCCTGGCCTAGAGGT    | GATGCAGGGATGATGTTCTG    |
| <i>Ccl2</i>   | Mouse   | TTAAAAACCTGGATCGGAACCAA | GCATTAGCTTCAGATTTACGGGT |
| <i>Ccr2</i>   | Mouse   | ATCCACGGCATACTATCAACATC | CAAGGCTCACCATCATCGTAG   |
| <i>Tp53</i>   | Mouse   | TGGAAGACTCCAGTGGGAAC    | CTTCTTCTGTACGGCGGTCT    |
| <i>Csf-1</i>  | Mouse   | GGAGTATCACCGAGGAGGTG    | ATTTGGCACGAGGTCTCCAT    |
| <i>Arg1</i>   | Mouse   | GGACCTGGCCTTTGTTGATG    | AACTGCCAGACTGTGGTCTC    |
| <i>Vegfa</i>  | Mouse   | CTGCTGTACCTCCACCATGC    | TCACTTCATGGGACTTCTGCTCT |
| <i>Il10</i>   | Mouse   | AAGGACCAGCTGGACAACAT    | TTCACAACCCTTGACTGCTG    |
| <i>Cx3cr1</i> | Mouse   | GACCGGTGTCACCATTAG      | AGTCACCCAGACACTCGTTG    |
| <i>Ccl5</i>   | Mouse   | TGCCACAGTCAAGGAGTATT    | TTCTTCTCTGGGTTGGCACA    |
| <i>Cxcl1</i>  | Mouse   | ACCCAAACCGAAGTCATAGC    | GTGCAATCAGAGCAGTCTGT    |
| <i>Il12a</i>  | Mouse   | AAATGAAGCTCTGCATCCTGC   | TCACCCTGTTGATGGTCACG    |
| <i>Il6</i>    | Mouse   | CCCAATTTCCAATGCTCTCC    | TGAATTGGATGGTCTTGGTCC   |
| <i>UBR5</i>   | Human   | CACCTTAGGAAGCCGCTGGA    | CGATCCCCTCCTCTCCGAAT    |
| <i>CCL2</i>   | Human   | AAGATCTCAGTGCAGAGGCT    | TGAACCCACTTCTGCTTGGG    |
| <i>MCSF</i>   | Human   | TCGGAGGCCTCTTGTCTAC     | TCCACCTGTCTGTCATCCTG    |
| <i>CXCL1</i>  | Human   | GCCAGTGCTTGACAGCCCT     | GGCTATGACTTCGGTTTGGG    |
| <i>IL6</i>    | Human   | AATTCGGTACATCCTCGACGG   | GGTTGTTTTCTGCCAGTGCC    |
| <i>GAPDH</i>  | Human   | GAAGGTGGAGGTCGGAGTCA    | TGGAATCATATTGGAACATGT   |
| <i>pac</i>    | yeast   | CGCAGCAACAGATGGAAGG     | GGAGGTCTCCAGGAAGGC      |

## Supplementary References

- 1 O'Brien, P. M. *et al.* The E3 ubiquitin ligase EDD is an adverse prognostic factor for serous epithelial ovarian cancer and modulates cisplatin resistance in vitro. *British journal of cancer* **98**, 1085-1093, doi:10.1038/sj.bjc.6604281 (2008).
